# Supplementary material for: Lanthanide-Based Langmuir–Blodgett Multilayers: Multi-Emissive, Temperature-Dependent Thin Films
Source: MDPI journal article supplement (doi:10.3390/chemistry4040096), 2022-11-07
Supplement: s1 [file s1]

Archive with 1 entries (1 files):
- chemistry-1945302-supplementary.pdf
